# Supplementary material for: KPC1 dishomeostasis-mediated by sympathetic nervous system over-excitement involved in myofiber types alteration and insulin resistance through NF-KB signaling pathway
Source: Research Square preprint supplement (doi:10.21203/rs.3.rs-8438697/v1), 2026-01-28
Supplement: Supplementary file 1 [file 60c94cc423c3378195a6e10c.docx]

KPC1 ‌dishomeostasis-mediated by sympathetic nervous system over-excitement involved in myofiber types alteration and insulin resistance through NF-KB signaling pathway

Zhong-yu Wang1,5*, Shi-jun Yi1*, Wei Xu1*, Li Xiang1,4*, Ye-peng Peng1, Jing Yue1,2, Jun-yi Wang1, Yun Liu1,6, Yue Zhang1, Xiang Liu1, Shuang Ni1, Liu-liu Shi1,7, Long Chen1,6, Ke Gong1,7, Fuli Zhang1,7, Ying-ming Li1, Wu-Zhou Wu1,3+, Shao-juan Chen1,2+, Shang-ling Pan5+, Jun-ming Tang1,7,8+

1Hubei Key Laboratory of Embryonic Stem Cell Research, department of physiology, School of Basic Medicine, Hubei University of Medicine, Shiyan442000, Hubei, China.

2Department of stomatology, Affiliated Stomatological Hospital, Guilin Medical University, Guilin 541199, Guangxi, China.

3Department of Spine Surgery, Affiliated Taihe Hospital, Hubei University of Medicine, Shiyan442000, Hubei, China.

4Endocrinology and Hematology Department, First People's Hospital of Wuxue City,Wuxue 435500, Hubei, China.

5Department of Pathophysiology, School of Basic Medicine, Guangxi Medical University, Nanning 530021, China

6Experimental Medical Center, Sinopharm Dongfeng General Hospital, Hubei University of Medicine, Shiyan442000, Hubei, China.

7Biomedical Research Institute, Hubei University of Medicine, Shiyan442000, Hubei, China.

8Hubei Provincial Clinical Medical Research Center for Umbilical Cord Blood Hematopoietic Stem Cell Therapy, Affiliated Taihe Hospital, Hubei University of Medicine, Shiyan442000, Hubei, China.

*****Zhong-yu Wang, Li Xiang, Wei Xu,Shi-jun Yi：These authors contributed equally to this work.

+Correspondence:Jun-ming Tang, [tangjm416@163.com](mailto:tangjm416@163.com); Shang-ling Pan， [slpan@gxmu.edu.cn;](mailto:slpan@gxmu.edu.cn，) Shao-juan Chen, [407220842@qq.com](mailto:296903590@qq.com);Wu-Zhou Wu, [527070330@qq.com](mailto:Xishibing2009@163.com)

**Supplementary method**

**Animals**

Based on a C57BL/6 background, KPC1 gene knockout (KPC1-/-) mice was generated through CRISPR-Cas9 technology (deletion of exons 1, 2, 8, 9 of NM_ 84585) on Cyagen Biosciences Inc., Suzhou, China (Supplementary Fig. 1). Genotyping with genomic DNA extracted from mouse tails was identified by using PCR technology. The primers (Sangon Biotech Co., Ltd., Shanghai, China) used were as follows: F1: 5’-TCAACCCTTGGACAGTATCCTC-3’; R1: 5’-CCTGTCACCCTTCTCCTTGAAC-3’; R2: 5’-GTCTGCTGTTTCTTACCCTC AC-3’. KPC1+/- , KPC1-/- and KPC1+/+ (Wild-type, WT) male mice from the same litter of mice were used in all studies unless otherwise stated. All the mice were housed in SPF (Specific Pathogen Free) class Laboratory Animal Center of Hubei University of Medicine, with a 12 h light/dark cycle and disinfected water. All mouse experiments were performed following the protocols approved by the Laboratory Animal Care and Ethics Committee of Hubei University of Medicine, China. The ethics committee number is 2024-S-169. The work has been reported in line with the ARRIVE guidelines 2.0.

**Reagents and chemicals**

SN-50 and PDTC were purchased from Selleck Chemicals LLC (Houston, Texas, USA), and prepared for the following experimental according to the manufacturer's instructions.

**Immunofluorescence double staining of skeletal muscle tissue**

The mice were anesthetized with isopentane, and then blood samples were collected. The mice were sacrificed by carbon dioxide and skeletal muscles were removed. The dissected tibialis anterior muscles, and soleus muscles from WT and KPC1-/- mice with or without osmotic pump administration of norepinephrine (NE) were fixed for 48 hours in 4% paraformaldehyde (BL539A, biosharp®, Beijing Labgic Technology Co., Ltd., Beijing, China), and embedded in paraffin (80200-0017, Citotest Labware Manufacturing Co.，Ltd., Haimen, China). The 5-micrometer-thick slice of the above samples were cut out and deparaffinised. Antigen retrieval were performed for these sections following the treatment of sodium citrate (pH 6.0) (BL604A, biosharp®, Beijing Labgic Technology Co., Ltd., Beijing, China) at 95°C for 5 minutes. One hour after optimal non-specific antigen blocking with 5% goat serum (ANT052, AntGene Biotechnology Co., Ltd., Wuhan, China) at room temperature. And then, the section were incubated with primary antibodies against type I fibers (1:200, ab234431, Abcam Corporation, Cambridge, England) and type II fibers (1:200, ab51263, Abcam Corporation, Cambridge, England) at 4°C overnight. Finally, appropriate horseradish peroxidase (HRP)-labelled secondary antibodies were used to show the fibers, and hematoxylin counterstaining of cell nuclei were performed. These images were captured under a microscope (BX53 + DP74, Olympus Corporation, Japan) [1].

**Glucose tolerance test (GTT) and insulin tolerance test (ITT)**

For the GTT, 20% glucose (A100188-0500, Sangon Biotech Co., Ltd., Shanghai, China) solution (1 mL/kg body weight) were intraperitoneally injected into the mice 16 hours after fasting. After injection, blood glucose was measured at the indicated time (0, 15, 30, 60, 90 and 120 min). For the ITT, insulin (BDPH-0036-A, biosharp®, Beijing Labgic Technology Co., Ltd., Beijing, China) (0.5 U/kg body weight) were subcutaneously injected into the mice 4 hours after fasting, and then blood glucose were measured at the indicated time (0, 15, 30, 45, 60 and 90 min) [2]. To control the order of injection and measurements, a fixed ear tag numbers was applied.

**Myoblast culture and differentiation**

C2C12 myoblast cells (SCSP-505) were purchased from the Cell Resource Center of the Shanghai Academy of Life Science, affiliated to the Chinese Academy of Sciences. The culture medium with high-glucose Dulbecco’s modified Eagle medium (DMEM, C11995500BT, Gibco®, Grand Island, New York State, USA) containing 10% fetal bovine serum (FBS, SA211.02, CellMax Co., Ltd., Beijing, China) and 1% v/v penicillin/streptomycin (SV30010, HyClone, Logan, Utah, USA), were used to culture C2C12 myoblast cells in an incubator with 5% CO2 at 37°C. Myoblast differentiation was performed following our previously reported method [2]. Briefly, the cells were cultured under the above medium and reached 75% confluence, and then incubated with replaced differentiation medium (DM) containing high-glucose DMEM and 2% horse serum (BI 04-124-1A, Sigma, St. Louis, Missouri, USA) for the indicated times, were observed daily by an inverted microscope (CKX53, Olympus Corporation, Japan). At the specified time points, differentiated myoblasts were observed and stained with the mature muscle fiber marker myosin heavy chain (MyHC) (1:200, sc-20641, Santa Cruz,Dallas, Texas, USA), type I fibers (1:200, ab234431, Abcam Corporation, Cambridge, England) and type II fibers (1:200, ab51263, Abcam Corporation, Cambridge, England), and imaged under a fluorescence microscope (COOLSHOT80i, Nikon, Japan). Fluorescence imaging was performed with the following filter sets: DAPI (excitation 325–375 nm, emission 435–485 nm), FITC (excitation 460–500 nm, emission 510–560 nm), and TRITC (excitation 530–560 nm, emission 570–620 nm) [2].

**Methods for continuous single-dose or osmotic pump administration of NE and E *in vitro***

To match the traits of long-term physiological or pathological levels NE or E in the tissues and plasma of people with health, sub-health and T2DM [3, 4, 5, 6], we created a novel method of osmotic pump administration of NE and E *in vitro*, apart from continuous single-dose administration *in vitro*. Briefly, osmotic pump administration of NE or E were treated at zero day of myoblast differentiation with replacing differentiation medium (DM) containing high-glucose DMEM and 2% horse serum for 6 days, different single doses were loaded as indicated (10-9 Mol/L, 10-8 Mol/L,10-7 Mol/L and10-6 Mol/L). Continuous single-dose administration of NE or E were treated at zero day of myoblast differentiation, and then added with NE or E once a day for 6 days. Different single doses, as indicated (10-8 Mol/L, 10-7 Mol/L,10-6 Mol/L and10-5 Mol/L), were added to the DM at 7- 8 PM each day when the DM was replaced.

**Detection of myoblast differentiation/fusion and myotube morphology by** **immunofluorescence**

Immunofluorescence staining was performed as our previously described [2]. Briefly, at the indicated time, after washed with PBS, the cells were fixed with 4% paraformaldehyde (BL539A, biosharp®, Beijing Labgic Technology Co., Ltd., Beijing, China), and incubated with the primary antibody MyHC (myotube marker, 1:200, sc-376157(FITC), sc-376157 (TRITC), sc-20641, Santa Cruz,Dallas, Texas, USA) and appropriate fluorescence-labelled secondary antibodies. The nuclei were stained with DAPI (D9542, Sigma-Aldrich®, Merck KGaA, Germany). Only MyHC positive myoblasts with 3 or more nuclei within a cellular structure were defined as myotubes, the other were excluded as differentiated cells without mutual fusion to myotubes. Two double-blind individuals evaluated all images by using Image J. The numbers of myotubes with more than 5 nuclei were calculated and analyzed.

Differentiated myoblasts were stained for Glut4, MEF2C, MyHC, NOQ or My32 using the polyclonal primary antibodies Glut4 (1:150,ab33780, Abcam Corporation, Cambridge, England), MEF2C (1:200, 5030S, Cell Signaling Technology Inc., Danvers, Massachusetts, USA), MyHC (1:200, sc-376157-FITC), slow skeletal myosin (NOQ7.5.4D, NOQ, 1:200, ab11083, Abcam Corporation, Cambridge, England) or fast myosin skeletal heavy chain (My32, ab51263, 1:200, Abcam Corporation, Cambridge, England) and the appropriate fluorescence-conjugated secondary antibodies. Images were captured under a microscope (IX53 + DP73, Olympus Corporation, Japan). The fluorescence microscope equipped with filter sets was used under the following conditions: a DAPI filter set (excitation: 325–375 nm, emission: 435–485 nm), a FITC filter set (excitation: 460–500 nm, emission: 510–560 nm), and a TRITC filter set (excitation: 530–560 nm, emission: 570–620 nm)[2].

**RT-qPCR**

Based on the expression of myosin heavy chain (MyHC) isoform, Skeletal muscle fibers are generally classified into four types: MyHC-1 (slow-twitch oxidative), MyHC-2a (fast-twitch oxidative), MyHC-2b (fast-twitch glycolytic), and MyHC-2x (fast-twitch oxidative-glycolytic) [22]. Their expression were detected on a CFX96TM real-time PCR detection system (Bio-Rad Inc., California, USA) using HiScript® III RT SuperMix for qPCR (+gDNA wiper) (R323-01, Vazyme Biotech Co., Ltd., Nanjing, China). The relative quantification 2-ΔΔCt method was used to evaluate the data, and expressed as mean ± SD. The four types myofibers primer sequences were shown in Supplementary Table 1.

**Western blot**

C2C12 myoblast cells were lysed in RIPA buffer (MA0151, MeilunBio®, Dalian, China) supplemented with PMSF (MB3800-1, MeilunBio®, Dalian, China). Proteins were separated by SDS-PAGE gel and transferred to a PVDF membrane (ISEQ00010, Merck Millipore, Merck KGaA, Germany). After the membrane was blocked with 5% skim milk (P0216, Beyotime Biotechnology Inc., Shanghai, China), the membrane was incubated with primary antibodies and then with horseradish peroxidase-conjugated secondary antibodies (IgG). The primary antibodies used were as follows: α-tubulin (1:10000, ab7291, Abcam Corporation, Cambridge, England), KPC1 (1:1000, sc-101122, Santa Cruz, Dallas, Texas, USA), NF-kBp50 (1:1000, 13586S, Cell Signaling Technology Inc., Danvers, Massachusetts, USA), NF-kBp65 (1:1000, sc-109, Santa Cruz, Dallas, Texas, USA). Protein expression was detected with a ChemiDocTM system (Bio-Rad Inc., California, USA), and gray level analysis was carried out with ImageJ software.

**Adenoviral vector construction, transfection and myotubes types assay**

KPC1-knockdown (Ad-shKPC1) adenoviral vectors used in our lab were constructed as described previously [1]. And KPC1-overexpressing (Ad-KPC1) adenoviral vectors were purchased from WZ Biosciences Inc (Jinan, China). To study the role of KPC1 in myoblast differentiation, Ad-shKPC1 or Ad-KPC1 (1 × 109 pfu) was added to the DM in zero or third day of myoblast cells differentiation. Meanwhile, continuous single-dose administration of NE (10-5 Mol/L) were treated at third day of myoblast differentiation, and then added with NE once a day for 6 days. At last, MyHC (1:200, sc-376157(FITC), sc-376157 (TRITC), sc-20641, Santa Cruz,Dallas, Texas, USA), slow skeletal myosin (MyHC-I, NOQ7.5.4D, NOQ, 1:200, ab11083, Abcam Corporation, Cambridge, England) or fast myosin skeletal heavy chain (MyHC-II, My32, ab51263, 1:200, Abcam Corporation, Cambridge, England), and appropriate fluorescence-labelled secondary antibodies were used to perform immunofluorescence staining. The nuclei were stained with DAPI (D9542, Sigma-Aldrich®, Merck KGaA, Germany). MyHC, MyHC-I or MyHC-II positive myoblasts with 3 or more nuclei within a cellular structure were defined as myotubes, the other were excluded as differentiated cells without mutual fusion to myotubes. The numbers of myotubes with more than 5 nuclei were calculated and analyzed. Over-expression and knockdown of KPC1 were identificatied by RP-PCR in myoblast cells after transfection (Supplementary Fig. 2).

**Immunofluorescence staining for NF-κB p50**

C2C12 myoblast cells were cultured under the above medium and reached 75% confluence, and then incubated with replaced differentiation medium (DM) containing high-glucose DMEM and 2% horse serum (BI 04-124-1A, Sigma, St. Louis, Missouri, USA). Subsequently, continuous single-dose administration of NE (10-5 Mol/L) were treated at third day of myoblast differentiation, and then added with NE once a day for 6 days, and Ad-KPC1 was added to the DM in third day of myoblast cells differentiation. Finally, the differentiated myoblasts were observed and stained with NF-kBp50 (1:1000, 13586S, Cell Signaling Technology Inc., Danvers, Massachusetts, USA), and imaged under a fluorescence microscope (COOLSHOT80i, Nikon, Japan). Fluorescence imaging was performed with the following filter sets: DAPI (excitation 325–375 nm, emission 435–485 nm), FITC (excitation 460–500 nm, emission 510–560 nm) [2].

**Glucose uptake assay**

Four days After C2C12 myoblasts differentiation in 24-well plates, glucose uptake assays were done by using the Glucose Uptake-GloTM Assay Kit (J1341, Promega Corporation, Madison, Wisconsin, USA) following the manufacturer's instructions [2].

**RNA-seq analysis**

Tibialis anterior muscles (TA), and soleus muscles (SL) from WT mice were sent to OE Biotech Co., Ltd. (Shanghai, China) for RNA extraction, library preparation, and sequencing. 150-bp paired-end reads were generated. Low quality reads were removed from the raw reads, and the clean reads were mapped to the *Mus musculus* reference genome sequence. Read counts for each gene were calculated using htseq software. Fragments per kilobase of exon per million mapped fragments (FPKM) were used to assess gene expression. Differentially expressed genes were identified using the following criteria: corrected *P* < 0.05 and log 2 (fold change) > 1[2].

**Transmission electron microscopy**

28 days after, Mitochondrial function were evaluated by using transmission electron microscopy in soleus muscles (SL) of mice with or without osmotic pump administration of NE.

**Statistical analysis**

Experimental data were analyzed and plotted by GraphPad Prism 8.0 software, and all the data are expressed as mean ± SD (standard deviation). Two groups were compared using the two-tailed Student's t-test and the confidence level is 95%, and more than two groups were compared using the One-way ANOVA test if the data normally distributed. The nonparametric test was used if the data was not normally distributed.

**References**

1.Luo B, Wu Y, Liu SL, Li XY, Zhu HR, Zhang L. Vagus nerve stimulation optimized cardiomyocyte phenotype, sarcomere organization and energy metabolism in infarcted heart through FoxO3A-VEGF signaling. *Cell Death Dis* **11**, 971 (2020)

2.Shi LL, Sun YT, Sun JN, Yue J, Chen W, Meng K. VEGF-B-mediated myofiber types involved in high-fat diet-induced hyperglycemia through PKA-NFATs signaling pathway. *Stem Cell Res Ther* **16**, 336 (2025)

3.Abdelgani S, Khattab A, Adams J, Abu-Farha M, Daniele G, Al-Mulla F. Distinct Mechanisms Responsible for the Increase in Glucose Production and Ketone Formation Caused by Empagliflozin in T2DM Patients. *Diabetes Care* **46**, 978-984 (2023)

4.Kim TH, Lee K, Park IB, Choi CS, Ahn TH, Lee DH. The effects of DPP4 inhibitors on the levels of plasma catecholamines and their metabolites in patients with type 2 diabetes. *Diabetes Res Clin Pract* **156,** 107832 (2019)

5.Wagner J, Lampert R, Tennen H, Feinn R. Exposure to Discrimination and Heart Rate Variability Reactivity to Acute Stress among Women with Diabetes. *Stress Health* **31**, 255-262 (2015)

6.Wang Y, Rijal B, Xu M, Li Z, An Y, Zhang F, Lu C. Renal denervation improves vascular endothelial dysfunction by inducing autophagy via AMPK/mTOR signaling activation in a rat model of type 2 diabetes mellitus with insulin resistance. *Acta Diabetol* **57**, 1227-1243 (2020)

**Supplemental Figures**

**Supplemental Figure 1. KPC1(RNF123) Knockout mice preparation and identificaiton**

**
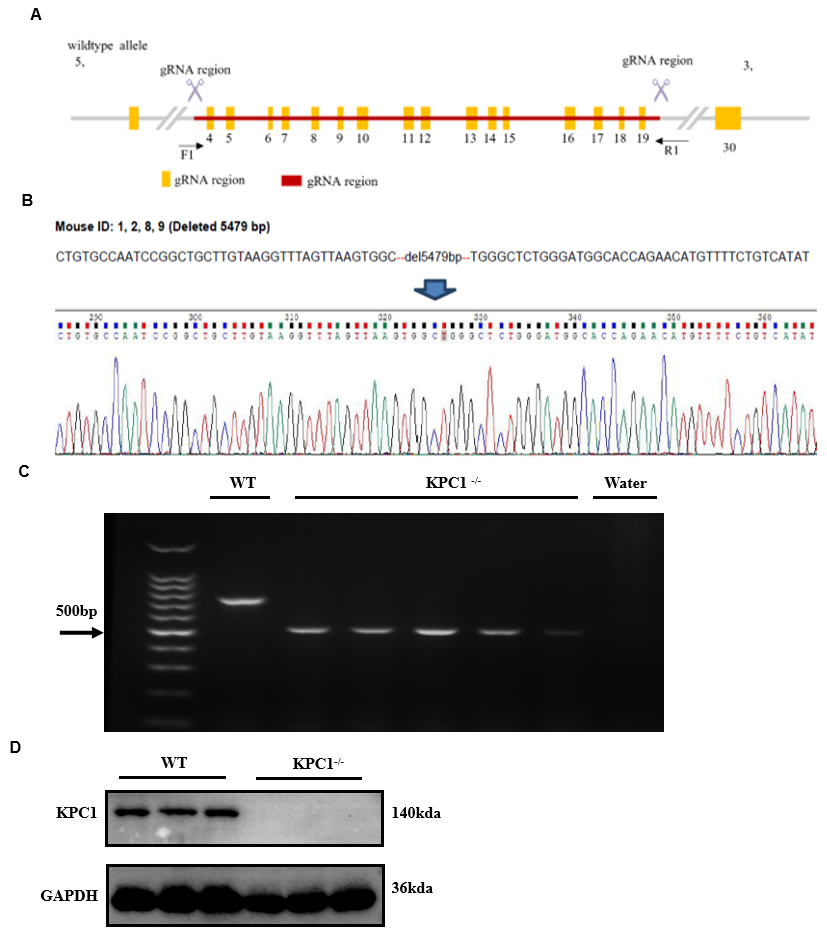
**

1. Scheme design diagram of KPC1(RNF123) Knockout mice；(B) Sequencing results of KPC1(RNF123) Knockout；（C）RT-PCR for KPC1(RNF123) Knockout identification;(D) Western Blot for KPC1(RNF123) Knockout in heart of mice.

**Supplemental Figure 2. KPC1 (RNF123) over-expression and knockdown identification**

**
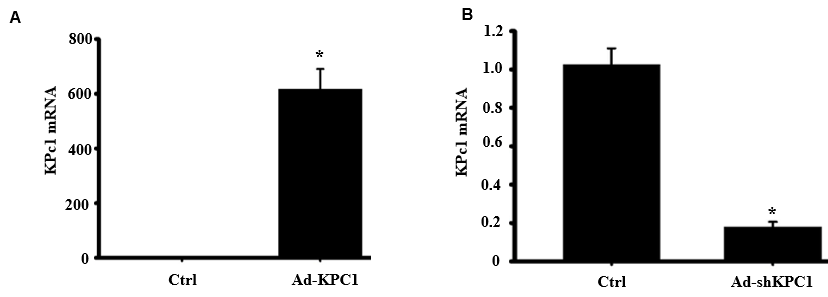
**

(A-B)Real-time RT-PCR for KPC1(RNF123) over-expression(A) and knockdown (B) identification;*P<0.05, vs. Ctrl.

**Supplemental Figure 3. The comparation among single, continuous single and osmotic pump administration of norepinephrine on affecting myoblast cells differentiation**

**
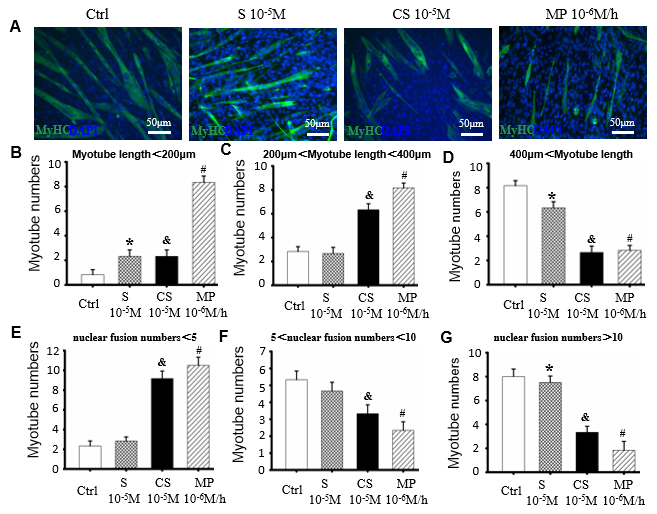
**

1. Typical images of skeletal myosin heavy chain (MyHC, sc-20641) immunofluorescence staining in the differentiated myoblast cells with different administration of NE for six days. Green fluorescence: MyHC; DAPI: nuclei. (B-D). Quantitative analysis of myotube numbers with different myotube length. (E-G). Quantitative analysis of myotube numbers with different nuclear fusion numbers. NE:norepinephrine; MP: osmotic pump; CS: S:single; CS: continuous single. *P<0.05, vs. Ctrl; &P<0.05, vs. S group; #P<0.05, vs. S or CS groups.

**Supplemental Figure4. NE with CS treatment inhibited C2C12 myoblast cells differentiation and type I/II myofibers formation in dosage-dependent manner**


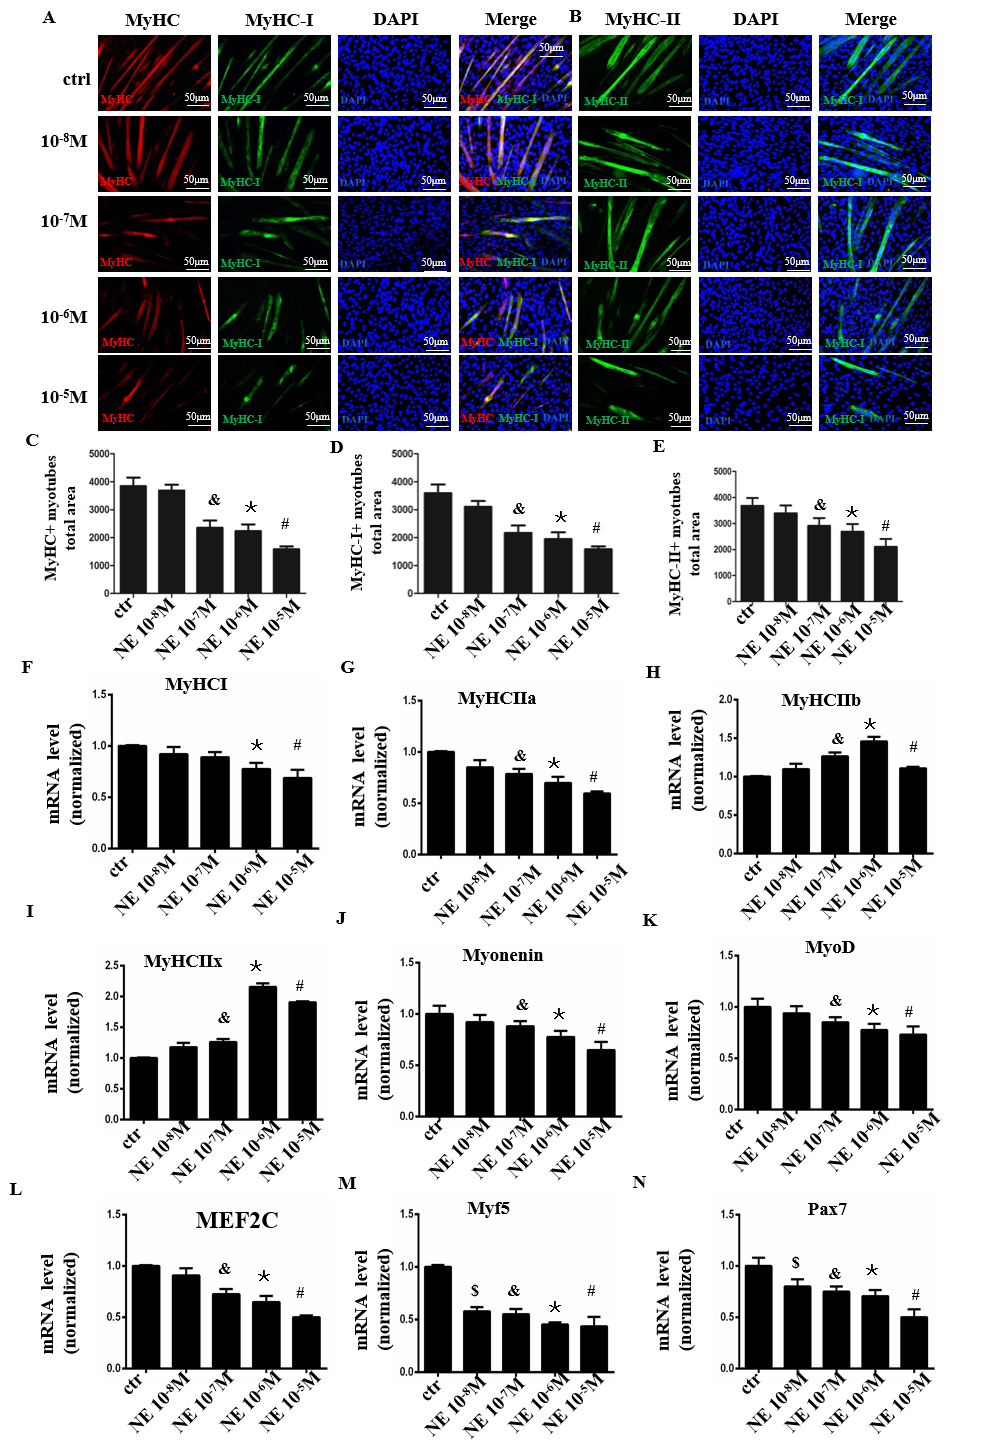


(A).Typical images of skeletal myosin heavy chain (MyHC, sc-20641) and type I (slow) skeletal myosin heavy chain (MyHC-I, NOQ7.5.4D clone antibody) immunofluorescence staining in the differentiated myoblast cells with CS administration of NE for six days. Red fluorescence: MyHC; green fluorescence: MyHC-I; DAPI: nuclei; (B).Typical images of type II (fast) skeletal myosin heavy chain (MyHC-II, MY-32 antibody) immunofluorescence staining in the differentiated myoblast cells with CS administration of NE for six days. Green fluorescence: MyHC-II; DAPI: nuclei. (C-E). Quantitative analysis of myotubes total area of MyHC, MyHC-I and MyHC-II positive myotubes. #P<0.05, vs. Other groups; &P<0.05, vs. 0, 10-8 Mol/L NE group; *P<0.05, vs. 0, 10-8 Mol/L NE group. (F-N). Real-time PCR of MyHC-I, MyHC-IIa, MyHC-IIb, MyHC-IIx, Myonenin, MyoD, MEF2C, Myf5 and Pax7 genes in the differentiated myoblast cells with CS administration of NE for six days. #P<0.05, vs. Other groups; &P<0.05, vs. 0, 10-8 Mol/L NE group; *P<0.05, vs. 0, 10-8 Mol/L NE group; $P<0.05, vs. 0 Mol/L NE group.

**Supplemental Figure5. NE with osmotic pump (MP) treatment inhibited C2C12 myoblast cells differentiation and type I/II myofibers formation in dosage-dependent manner**

**
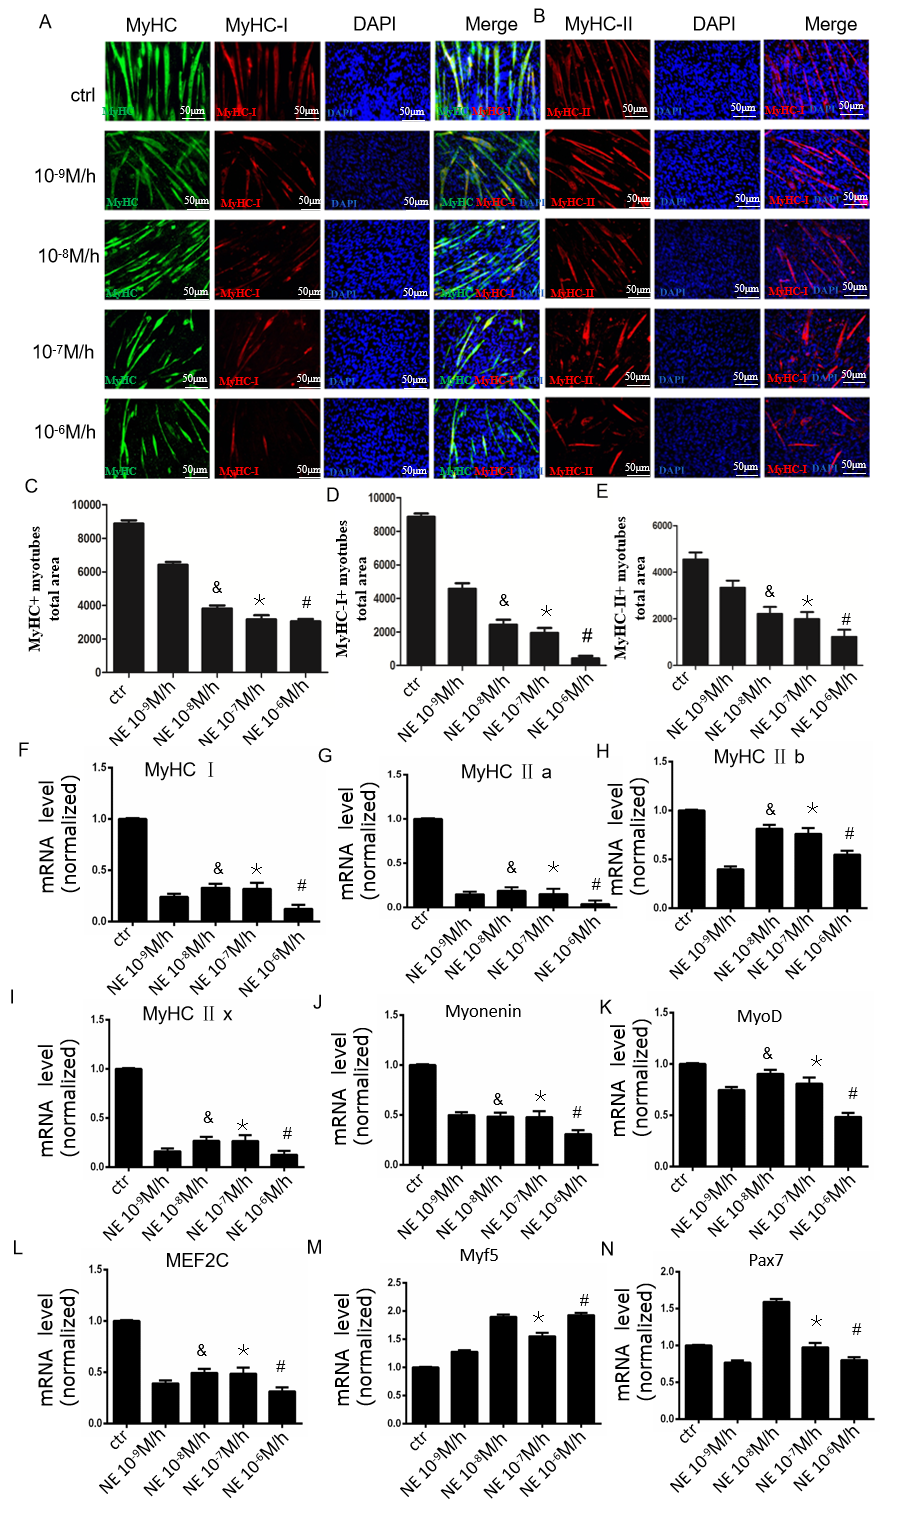
**

(A).Typical images of skeletal myosin heavy chain (MyHC, sc-20641) and type I (slow) skeletal myosin heavy chain (MyHC-I, NOQ7.5.4D clone antibody) immunofluorescence staining in the differentiated myoblast cells with MP administration of NE for six days. Green fluorescence: MyHC; red fluorescence: MyHC-I; DAPI: nuclei; (B).Typical images of type II (fast) skeletal myosin heavy chain (MyHC-II, MY-32 antibody) immunofluorescence staining in the differentiated myoblast cells with MP administration of NE for six days. Red fluorescence: MyHC-II; DAPI: nuclei. (C-E). Quantitative analysis of myotubes total area of MyHC, MyHC-I and MyHC-II positive myotubes. #P<0.05, vs. Other groups; &P<0.05, vs. 0, 10-8 Mol/L NE group; *P<0.05, vs. 0, 10-8 Mol/L NE group. (F-N). Real-time PCR of MyHC-I, MyHC-IIa, MyHC-IIb, MyHC-IIx, Myonenin, MyoD, MEF2C, Myf5 and Pax7 genes in the differentiated myoblast cells with MP administration of NE for six days. #P<0.05, vs. Other groups; *P<0.05, vs. 0, 10-8 Mol/L NE group.

**Supplemental Figure 6. NE with MP treatment decreased MEF2C positive nucleus numbers during C2C12 myoblast cells differentiation in dosage-dependent manner**

**
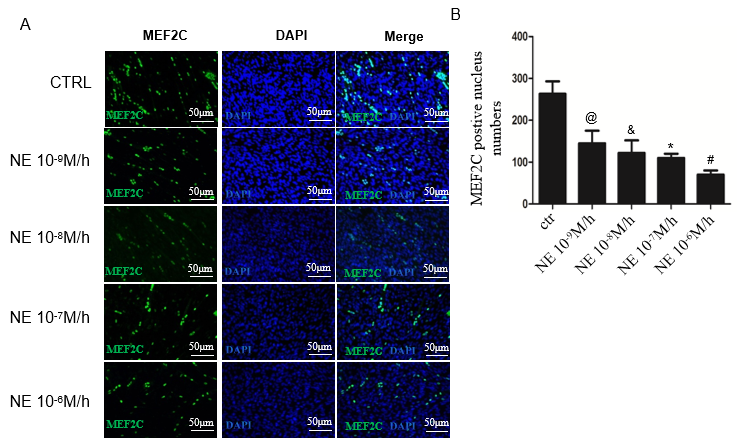
**

1. .Typical images of MEF2C immunofluorescence staining in the differentiated myoblast cells with MP administration of NE for six days. Green fluorescence: MEF2C; DAPI: nuclei; (C) Quantitative analysis of MEF2C positive nucleus numbers. @P<0.05, vs. Ctrl group; &P<0.05, vs. 0, 10-8 Mol/L NE group; *P<0.05, vs. 0, 10-8 Mol/L NE group; #P<0.05, vs. Other groups.

**Supplemental Figure 7. NE inhibited Glut4 and IRS-1 expressions in dosage-dependent manner**

**
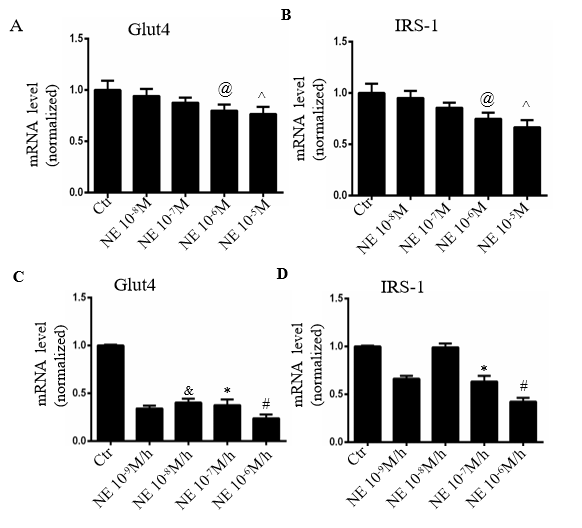
**

1. D).Real-time PCR of Glut4 and IRS-1 in the differentiated myoblast cells with MP or CS administration of NE for six days. @P<0.05, vs. 0, 10-8 Mol/L NE group; ^P<0.05, vs. 0, 10-8 Mol/L NE group; &P<0.05, vs. 0 Mol/L NE group; *P<0.05, vs. 0 Mol/L NE group; #P<0.05, vs. Other groups. Ctrl: control group, MP:osmotic pump, and CS:continuous single.

**Supplemental Figure 8. KPC1 reversed the inhibitory effects of NE on the reduced MyHC-II+ myotube numbers in time-dependent manner**

**
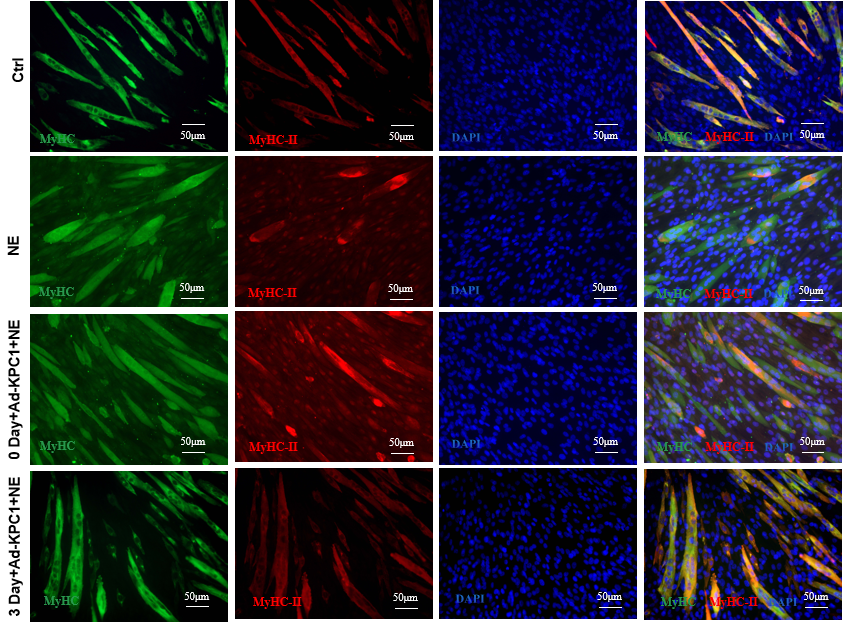
**

Typical images of MyHC-II (MY-32 antibody) immunofluorescence staining in the differentiated myoblast cells with treatment of NE (10-5 Mol/L) in the indicated group.

**Supplemental Figure 9. Epinephrine (E) with CS treatment inhibited myoblast cells differentiation and myotubes formation**

**
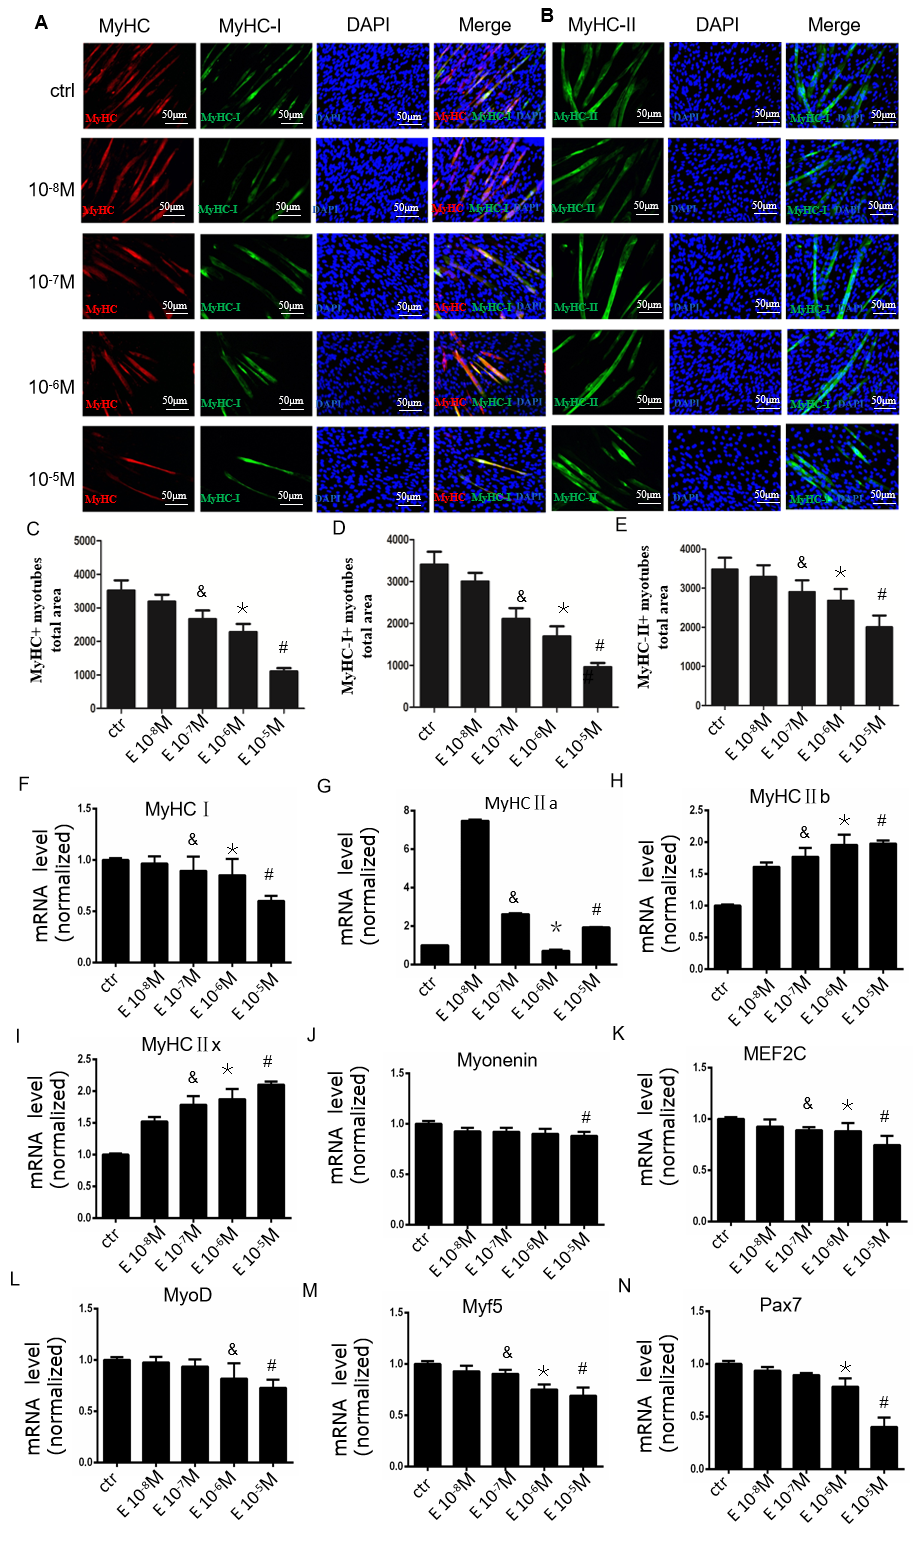
**

1. .Typical images of skeletal myosin heavy chain (MyHC, sc-20641) and type I (slow) skeletal myosin heavy chain (MyHC-I, NOQ7.5.4D clone antibody) immunofluorescence staining in the differentiated myoblast cells with CS administration of E for six days. Red fluorescence: MyHC; green fluorescence: MyHC-I; DAPI: nuclei; (B).Typical images of type II (fast) skeletal myosin heavy chain (MyHC-II, MY-32 antibody) immunofluorescence staining in the differentiated myoblast cells with CS administration of E for six days. Green fluorescence: MyHC-II; DAPI: nuclei. (C-N). Real-time PCR of MyHC-I, MyHC-IIa, MyHC-IIb, MyHC-IIx, Myonenin, MyoD, MEF2C, Myf5 and Pax7 genes in the differentiated myoblast cells with CS administration of E for six days. #P<0.05, vs. Other groups; &P<0.05, vs. 0, 10-8 Mol/L E group; *P<0.05, vs. 0, 10-8 Mol/L E group.

**Supplemental Figure 10. Epinephrine (E) with MP treatment inhibited myoblast cells differentiation and myotubes formation**

**
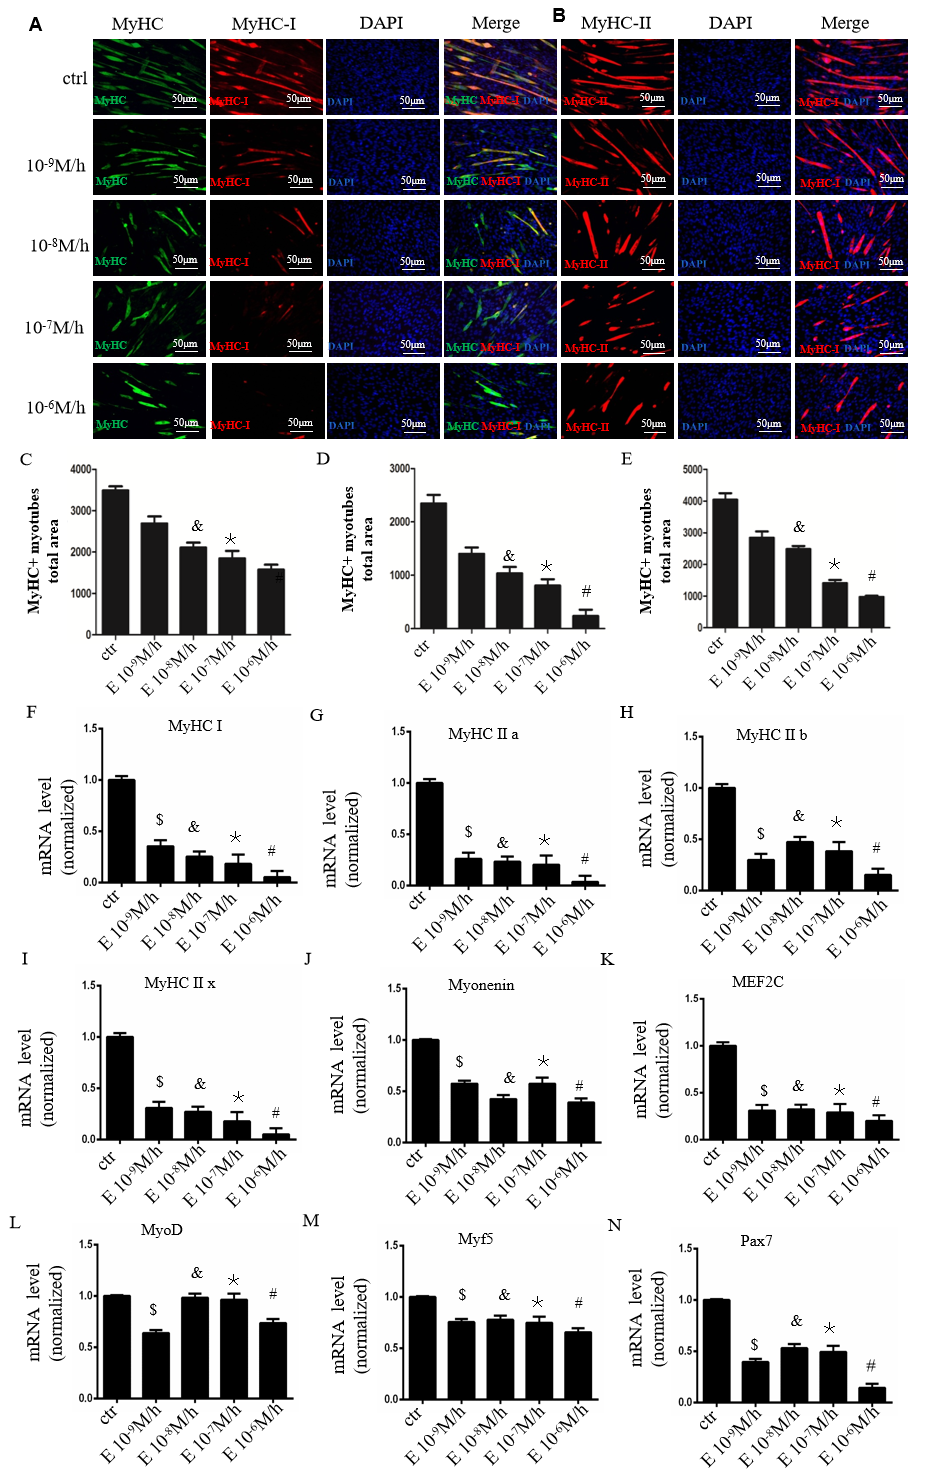
**

(A).Typical images of skeletal myosin heavy chain (MyHC, sc-20641) and type I (slow) skeletal myosin heavy chain (MyHC-I, NOQ7.5.4D clone antibody) immunofluorescence staining in the differentiated myoblast cells with MP administration of E for six days. Green fluorescence: MyHC; red fluorescence: MyHC-I; DAPI: nuclei; (B).Typical images of type II (fast) skeletal myosin heavy chain (MyHC-II, MY-32 antibody) immunofluorescence staining in the differentiated myoblast cells with MP administration of E for six days. Red fluorescence: MyHC-II; DAPI: nuclei. (C-N). Real-time PCR of MyHC-I, MyHC-IIa, MyHC-IIb, MyHC-IIx, Myonenin, MyoD, MEF2C, Myf5 and Pax7 genes in the differentiated myoblast cells with MP administration of E for six days. $P<0.05, vs. Ctrl group; #P<0.05, vs. Other groups; *P<0.05, vs. 0, 10-9 Mol/L E group; &P<0.05, vs. 0, 10-9 Mol/L E group.

**Supplemental Figure 11. E with MP treatment decreased MEF2C positive nucleus numbers, Glut4 and IRS-1 expressions during C2C12 myoblast cells differentiation in dosage-dependent manner**

**
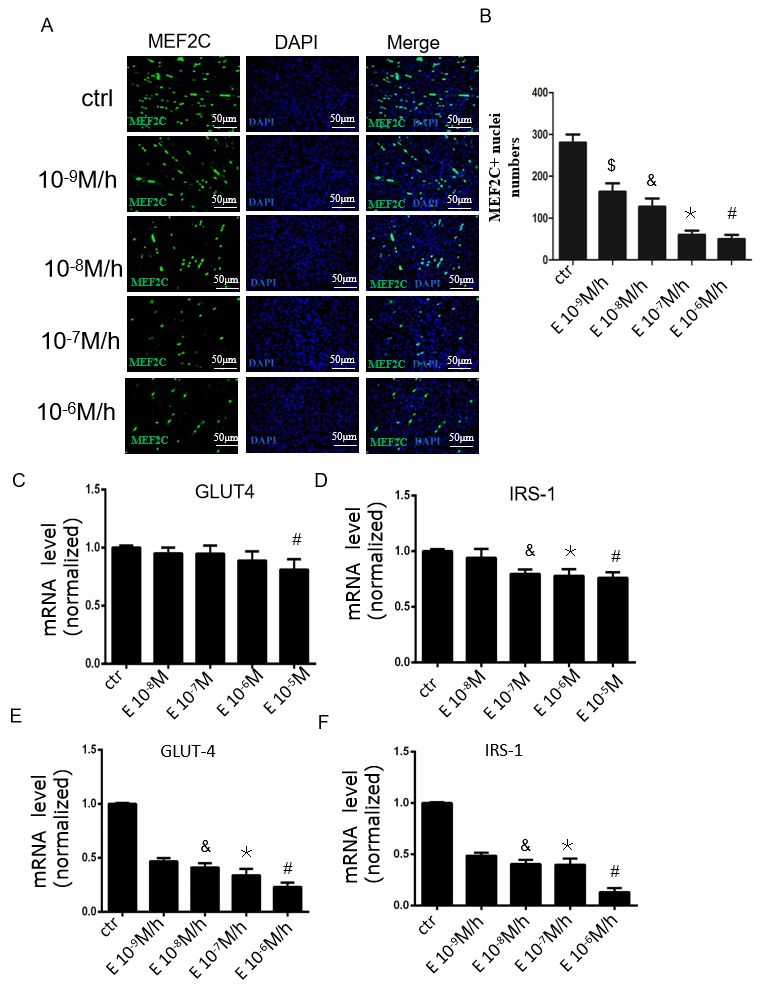
**

1. .Typical images of MEF2C immunofluorescence staining in the differentiated myoblast cells with MP administration of E for six days. Green fluorescence: MEF2C; DAPI: nuclei; (B). Quantitative analysis of MEF2C positive nucleus numbers. $P<0.05, vs. Ctrl group; &P<0.05, vs. Other groups; *P<0.05, vs. Other groups; #P<0.05, vs. Other groups. (C).Real-time PCR of Glut4 and IRS-1 in the differentiated myoblast cells with MP administration of E for six days. &P<0.05, vs. 0 Mol/L NE group; *P<0.05, vs. 0 Mol/L NE group; #P<0.05, vs. Other groups. Ctrl: control, MP:osmotic pump.

**Supplemental Figure 12. MP treatment of E more obviously inhibited myoblast cells differentiation and myotubes formation**

**
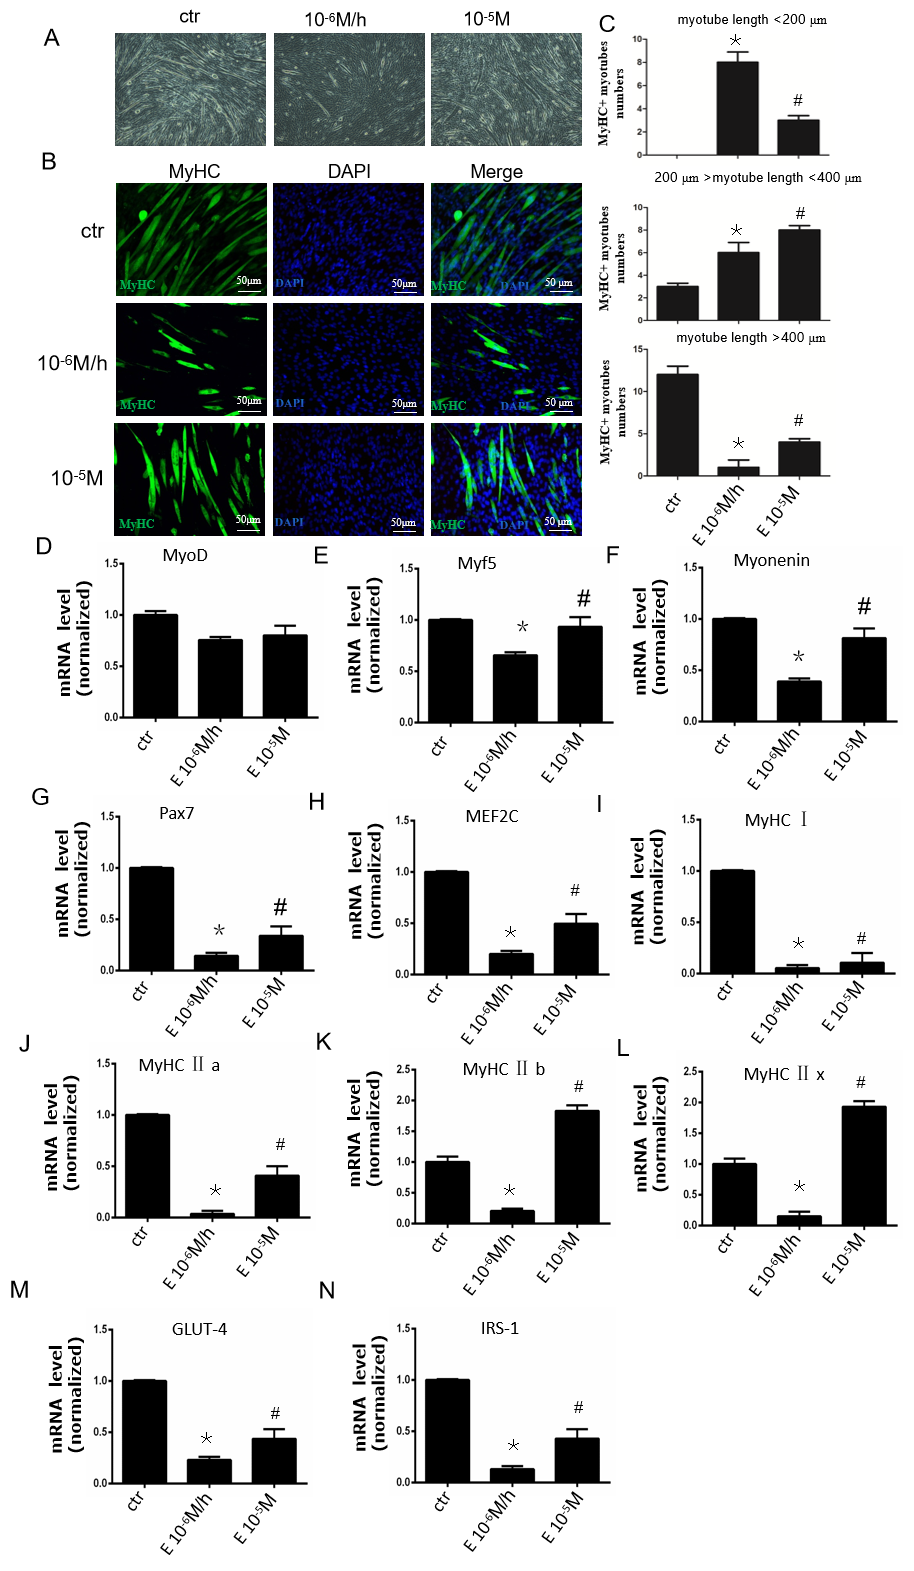
**

(A).Typical images of myoblast cells differentiation and myotubes formation under optical microscope. (B).Typical images of MyHC immunofluorescence staining in the differentiated myoblast cells with MP or CS administration of E for six days. Green fluorescence: MyHC; DAPI: nuclei; (C). Quantitative analysis of MyHC positive myotubes numbers. *P<0.05, vs. Ctrl group; #P<0.05, vs. 10-6 Mol/L E 10-6M/h. (D-N). (D-N). Real-time PCR of MyHC-I, MyHC-IIa, MyHC-IIb, MyHC-IIx, Myonenin, MyoD, MEF2C, Myf5 and Pax7 genes in the differentiated myoblast cells with MP administration of E for six days. *P<0.05, vs. Ctrl group; #P<0.05, vs. 10-6 Mol/L E 10-6M/h.

**Supplemental Figure 13. KPC1 inversed the inhibitory effects of ISO or E-induced myoblast cells differentiation and myotubes formation through NFKB**

**
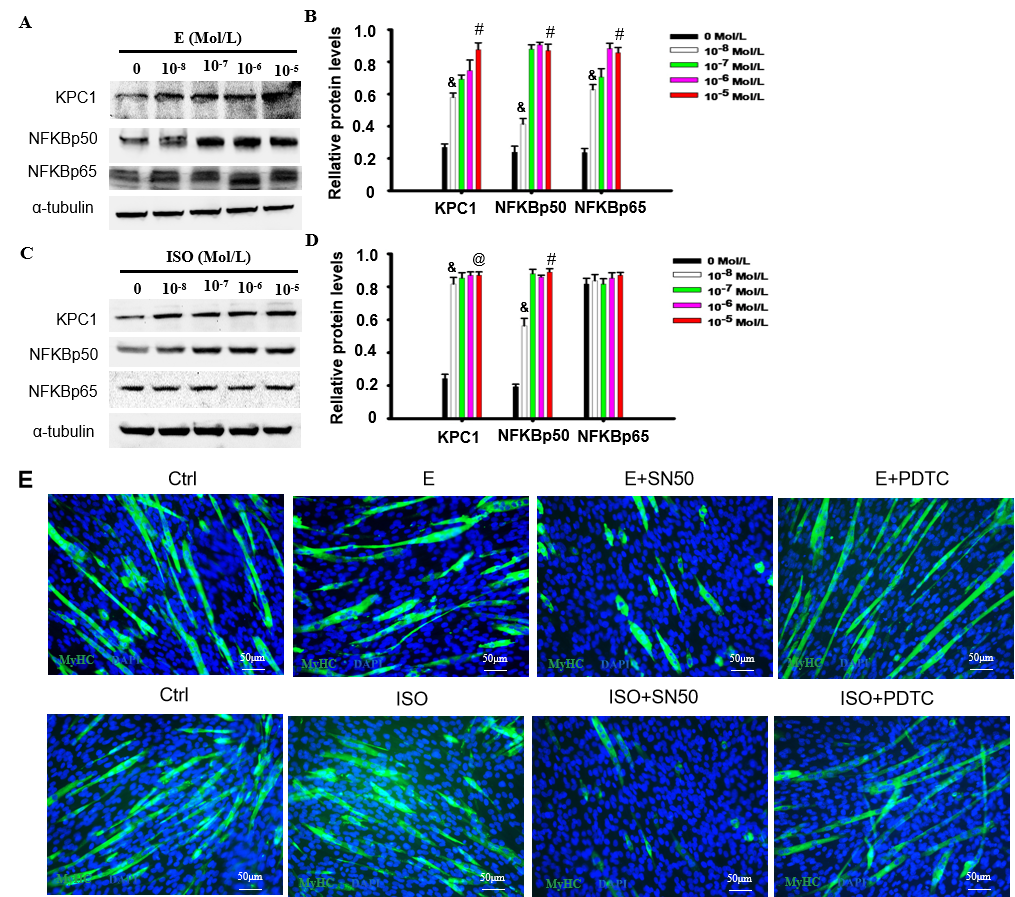
**

1. B). KPC1, NF-kBp50 and p65 protein levels in the differentiated myoblast cells with CS treatment of epinephrine (E) as determined by Western Blot. (A). Typical Western Blot results. (B). Semi-quantitative analysis of KPC1, NF-kBp50 and p65. &P<0.05, vs. 0 Mol/L E group; #P<0.05, vs. other E group. (C-D). KPC1, NF-kBp50 and p65 protein levels in the differentiated myoblast cells with CS treatment of isoproterenol (ISO) as determined by Western Blot. (C). Typical western blot results. (D). Semi-quantitative analysis of KPC1, NF-kBp50 and p65. &P<0.05, vs. 0 Mol/L ISO group; #P<0.05, vs. 10-8 Mol/L ISO group; @P>0.05, vs. 10-8, 10-7 or 10-6 Mol/L ISO group. (E). Typical images of MyHC immunofluorescence staining in the differentiated myoblast cells with CS treatment of E (10-5 Mol/L) or ISO (10-5 Mol/L) following the addition of NF-kBp50 inhibitor SN50, or NF-kBp65 inhibitor PDTC.
