# Supplementary material for: KPC1 dishomeostasis-mediated by sympathetic nervous system over-excitement involved in myofiber types alteration and insulin resistance through NF-KB signaling pathway
Source: Research Square preprint supplement (doi:10.21203/rs.3.rs-8438697/v1), 2026-01-28
Supplement: Supplementary file 2 [file e00c7918202021dcc169cd2f.docx]

KPC1 ‌dishomeostasis-mediated by sympathetic nervous system over-excitement involved in myofiber types alteration and insulin resistance through NF-KB signaling pathway

Zhong-yu Wang1,5*, Shi-jun Yi1*, Wei Xu1*, Li Xiang1,4*, Ye-peng Peng1, Jing Yue1,2, Jun-yi Wang1, Yun Liu1,6, Yue Zhang1, Xiang Liu1, Shuang Ni1, Liu-liu Shi1,7, Long Chen1,6, Ke Gong1,7, Fuli Zhang1,7, Ying-ming Li1, Wu-Zhou Wu1,3+, Shao-juan Chen1,2+, Shang-ling Pan5+, Jun-ming Tang1,7,8+

1Hubei Key Laboratory of Embryonic Stem Cell Research, department of physiology, School of Basic Medicine, Hubei University of Medicine, Shiyan442000, Hubei, China.

2Department of stomatology, Affiliated Stomatological Hospital, Guilin Medical University, Guilin 541199, Guangxi, China.

3Department of Spine Surgery, Affiliated Taihe Hospital, Hubei University of Medicine, Shiyan442000, Hubei, China.

4Endocrinology and Hematology Department, First People's Hospital of Wuxue City,Wuxue 435500, Hubei, China.

5Department of Pathophysiology, School of Basic Medicine, Guangxi Medical University, Nanning 530021, China

6Experimental Medical Center, Sinopharm Dongfeng General Hospital, Hubei University of Medicine, Shiyan442000, Hubei, China.

7Biomedical Research Institute, Hubei University of Medicine, Shiyan442000, Hubei, China.

8Hubei Provincial Clinical Medical Research Center for Umbilical Cord Blood Hematopoietic Stem Cell Therapy, Affiliated Taihe Hospital, Hubei University of Medicine, Shiyan442000, Hubei, China.

*****Zhong-yu Wang, Li Xiang, Wei Xu,Shi-jun Yi：These authors contributed equally to this work.

+Correspondence:Jun-ming Tang, [tangjm416@163.com](mailto:tangjm416@163.com); Shang-ling Pan， [slpan@gxmu.edu.cn;](mailto:slpan@gxmu.edu.cn，) Shao-juan Chen, [407220842@qq.com](mailto:296903590@qq.com);Wu-Zhou Wu, [527070330@qq.com](mailto:Xishibing2009@163.com)

**Supplementary table**

**Supplementary Table 1 The primer sequences for RT-qPCR**

Gene Forward (5'-3') Reverse (5'-3')

mMyogenin GAGACATCCCCCTATTTCTACCA GCTCAGTCCGCTCATAGCC

mMyoD1 CCACTCCGGGACATAGACTTG AAAAGCGCAGGTCTGGTGAG

mMyf5 GCCTTCGGAGCACACAAAG TGACCTTCTTCAGGCGTCTAC

mPax7 TCTCCAAGATTCTGTGCCGAT CGGGGTTCTCTCTCTTATACTCC

mIrs1 CGATGGCTTCTCAGACGTG CAGCCCGCTTGTTGATGTTG

mGlut4 GTAACTTCATTGTCGGCATGG AGCTGAGATCTGGTCAAACG

mMyHC1 CAAGCAGCAGTTGGATGAGCGACT TCCTCCAGCTCCTCGATGCGT

mMyHC2a AGAGGACGACTGCAGACCGAAT GAGTGAATGCTTGCTTCCCCCTTG

mMyHC2b ACGCTTGCACACAGAGTCAG CTTGGACTCTTCCTCTAGCTGCC

mMyHC2x ACCAAGGAGGAGGAACAGCAGC GAATGCCTGTTTGCCCCTGGAG

mMEF2C GAGACCTGATGGAGAGGTTGG TCTTGTAAGACTCCACTTTGGCA

mGAPDH ATGACTCCACTCACGGCAAA ATGATGACCCTTTTGGCTCC

mKPC1 AACTTTGGCACTATCCGTTCTAC TCCTCCTGATTAAAGCGGCAG
